# Supplementary material for: Disrupting Plasmodium UIS3–host LC3 interaction with a small molecule causes parasite elimination from host cells
Source: PubMed Central journal article supplement (PMC7677311; doi:10.1038/s42003-020-01422-1), 2020-11-19
Supplement: 42003_2020_1422_MOESM3_ESM.pdf [file 42003_2020_1422_MOESM3_ESM.pdf]

### **Description of Additional Supplementary Files**

File Name: Supplementary Data 1

Description: Source data for main figures.

File Name: Supplementary Data 2

Description: Chemdraw file for C4 structure

File Name: Supplementary Data 3

Description: Details of the statistical analysis performed during this study
