# Supplementary material for: Disrupting Plasmodium UIS3–host LC3 interaction with a small molecule causes parasite elimination from host cells
Source: PubMed Central journal article supplement (PMC7677311; doi:10.1038/s42003-020-01422-1), 2020-11-19
Supplement: 42003_2020_1422_MOESM7_ESM.pdf [file 42003_2020_1422_MOESM7_ESM.pdf]

## Reporting Summary

Nature Research wishes to improve the reproducibility of the work that we publish. This form provides structure for consistency and transparency in reporting. For further information on Nature Research policies, see our [Editorial Policies](#) and the [Editorial Policy Checklist](#).

### Statistics

For all statistical analyses, confirm that the following items are present in the figure legend, table legend, main text, or Methods section.

n/a Confirmed

- |                                     |                                     |                                                                                                                                                                                                                                                            |
|-------------------------------------|-------------------------------------|------------------------------------------------------------------------------------------------------------------------------------------------------------------------------------------------------------------------------------------------------------|
| <input type="checkbox"/>            | <input checked="" type="checkbox"/> | The exact sample size ( $n$ ) for each experimental group/condition, given as a discrete number and unit of measurement                                                                                                                                    |
| <input type="checkbox"/>            | <input checked="" type="checkbox"/> | A statement on whether measurements were taken from distinct samples or whether the same sample was measured repeatedly                                                                                                                                    |
| <input type="checkbox"/>            | <input checked="" type="checkbox"/> | The statistical test(s) used AND whether they are one- or two-sided<br><i>Only common tests should be described solely by name; describe more complex techniques in the Methods section.</i>                                                               |
| <input checked="" type="checkbox"/> | <input type="checkbox"/>            | A description of all covariates tested                                                                                                                                                                                                                     |
| <input checked="" type="checkbox"/> | <input type="checkbox"/>            | A description of any assumptions or corrections, such as tests of normality and adjustment for multiple comparisons                                                                                                                                        |
| <input type="checkbox"/>            | <input checked="" type="checkbox"/> | A full description of the statistical parameters including central tendency (e.g. means) or other basic estimates (e.g. regression coefficient) AND variation (e.g. standard deviation) or associated estimates of uncertainty (e.g. confidence intervals) |
| <input type="checkbox"/>            | <input checked="" type="checkbox"/> | For null hypothesis testing, the test statistic (e.g. $F$ , $t$ , $r$ ) with confidence intervals, effect sizes, degrees of freedom and $P$ value noted<br><i>Give <math>P</math> values as exact values whenever suitable.</i>                            |
| <input checked="" type="checkbox"/> | <input type="checkbox"/>            | For Bayesian analysis, information on the choice of priors and Markov chain Monte Carlo settings                                                                                                                                                           |
| <input checked="" type="checkbox"/> | <input type="checkbox"/>            | For hierarchical and complex designs, identification of the appropriate level for tests and full reporting of outcomes                                                                                                                                     |
| <input checked="" type="checkbox"/> | <input type="checkbox"/>            | Estimates of effect sizes (e.g. Cohen's $d$ , Pearson's $r$ ), indicating how they were calculated                                                                                                                                                         |

*Our web collection on [statistics for biologists](#) contains articles on many of the points above.*

### Software and code

Policy information about [availability of computer code](#)

Data collection

Data analysis

For manuscripts utilizing custom algorithms or software that are central to the research but not yet described in published literature, software must be made available to editors and reviewers. We strongly encourage code deposition in a community repository (e.g. GitHub). See the Nature Research [guidelines for submitting code & software](#) for further information.

### Data

Policy information about [availability of data](#)

All manuscripts must include a [data availability statement](#). This statement should provide the following information, where applicable:

- Accession codes, unique identifiers, or web links for publicly available datasets
- A list of figures that have associated raw data
- A description of any restrictions on data availability

### Field-specific reporting

## Life sciences study design

All studies must disclose on these points even when the disclosure is negative.

|                 |                                                                                                                                                           |
|-----------------|-----------------------------------------------------------------------------------------------------------------------------------------------------------|
| Sample size     | Sample sizes on mice experiments were chosen on the basis of historical data.                                                                             |
| Data exclusions | No data were excluded.                                                                                                                                    |
| Replication     | Authors have mentioned the number of replication for all experiments in respective Figure legends and Supplementary Data 3. All attempts were successful. |
| Randomization   | Radomization was not relevant to this study.                                                                                                              |
| Blinding        | To study Lamp1 dynamics around the PVM after C4 treatment, samples were blinded before imaging and image analysis.                                        |

## Reporting for specific materials, systems and methods

We require information from authors about some types of materials, experimental systems and methods used in many studies. Here, indicate whether each material, system or method listed is relevant to your study. If you are not sure if a list item applies to your research, read the appropriate section before selecting a response.

### Materials & experimental systems

| n/a                                 | Involvement in the study                                        |
|-------------------------------------|-----------------------------------------------------------------|
| <input type="checkbox"/>            | <input checked="" type="checkbox"/> Antibodies                  |
| <input type="checkbox"/>            | <input checked="" type="checkbox"/> Eukaryotic cell lines       |
| <input checked="" type="checkbox"/> | <input type="checkbox"/> Palaeontology and archaeology          |
| <input type="checkbox"/>            | <input checked="" type="checkbox"/> Animals and other organisms |
| <input checked="" type="checkbox"/> | <input type="checkbox"/> Human research participants            |
| <input checked="" type="checkbox"/> | <input type="checkbox"/> Clinical data                          |
| <input checked="" type="checkbox"/> | <input type="checkbox"/> Dual use research of concern           |

### Methods

| n/a                                 | Involvement in the study                           |
|-------------------------------------|----------------------------------------------------|
| <input checked="" type="checkbox"/> | <input type="checkbox"/> ChIP-seq                  |
| <input type="checkbox"/>            | <input checked="" type="checkbox"/> Flow cytometry |
| <input checked="" type="checkbox"/> | <input type="checkbox"/> MRI-based neuroimaging    |

## Antibodies

|                 |                                                                                                                                                                                                                                                                                                                                                                                                                                                                                                                                                                                                                                                                                                                                                                                                                                                                                                                                                                                                                                                                                                                                                                                                                                                                                                                                                                                                                                                                                                                                                                                                                                                                                                                                                                                                                                                                                                                                                                                                                                                                                                                                                                                                                                                                                                                                                                                                                                                                                                                                                                                                                                                                                                                                                                                                                                                                                                                                                                                                                                                                     |
|-----------------|---------------------------------------------------------------------------------------------------------------------------------------------------------------------------------------------------------------------------------------------------------------------------------------------------------------------------------------------------------------------------------------------------------------------------------------------------------------------------------------------------------------------------------------------------------------------------------------------------------------------------------------------------------------------------------------------------------------------------------------------------------------------------------------------------------------------------------------------------------------------------------------------------------------------------------------------------------------------------------------------------------------------------------------------------------------------------------------------------------------------------------------------------------------------------------------------------------------------------------------------------------------------------------------------------------------------------------------------------------------------------------------------------------------------------------------------------------------------------------------------------------------------------------------------------------------------------------------------------------------------------------------------------------------------------------------------------------------------------------------------------------------------------------------------------------------------------------------------------------------------------------------------------------------------------------------------------------------------------------------------------------------------------------------------------------------------------------------------------------------------------------------------------------------------------------------------------------------------------------------------------------------------------------------------------------------------------------------------------------------------------------------------------------------------------------------------------------------------------------------------------------------------------------------------------------------------------------------------------------------------------------------------------------------------------------------------------------------------------------------------------------------------------------------------------------------------------------------------------------------------------------------------------------------------------------------------------------------------------------------------------------------------------------------------------------------------|
| Antibodies used | <p>Immunofluorescence primary antibodies: PbUIS4 (goat polyclonal, SicGen, AB0042-200, 1:1000), HA (mouse monoclonal, BioLegend, 901509, 1:500) and Lamp1 (rabbit polyclonal, Sigma, L1418, 1:1000). GFP signal was detected using AlexaFluor 488 conjugated anti GFP (rabbit polyclonal, Invitrogen, A-21311, 1:500) antibody. AlexaFluor-conjugated immunofluorescence secondary antibodies were from Invitrogen.</p> <p>Western Blot antibodies: p62 (rabbit polyclonal, Sigma-Aldrich, P0067, 1:1000), gamma-tubulin (mouse monoclonal, Sigma-Aldrich, T5326, 1: 10,000), LC3 (rabbit polyclonal, MBL, PM036, 1:1000), Atg5 (rabbit polyclonal, Cell Signalling Technology, 2630, 1:1000) and <math>\beta</math> actin (mouse monoclonal, Abcam, ab8224, 1:1000).</p>                                                                                                                                                                                                                                                                                                                                                                                                                                                                                                                                                                                                                                                                                                                                                                                                                                                                                                                                                                                                                                                                                                                                                                                                                                                                                                                                                                                                                                                                                                                                                                                                                                                                                                                                                                                                                                                                                                                                                                                                                                                                                                                                                                                                                                                                                           |
| Validation      | <p>Validation statement of each antibody can be found on the manufacturer's website.</p> <p>Immunofluorescence primary antibodies<br/> PbUIS4: <a href="http://www.sicgen.pt/product/uis4-polyclonal-antibody_1_11">http://www.sicgen.pt/product/uis4-polyclonal-antibody_1_11</a><br/> HA: <a href="https://www.biolegend.com/en-us/products/alexa-fluor-488-anti-ha-11-epitope-tag-antibody-10993">https://www.biolegend.com/en-us/products/alexa-fluor-488-anti-ha-11-epitope-tag-antibody-10993</a><br/> Lamp1: <a href="https://www.sigmaaldrich.com/catalog/product/sigma/l1418?lang=pt&amp;region=PT">https://www.sigmaaldrich.com/catalog/product/sigma/l1418?lang=pt&amp;region=PT</a><br/> GFP: <a href="https://www.thermofisher.com/antibody/product/GFP-Antibody-Polyclonal/A-21311">https://www.thermofisher.com/antibody/product/GFP-Antibody-Polyclonal/A-21311</a></p> <p>Immunofluorescence secondary antibodies<br/> <a href="https://www.thermofisher.com/antibody/product/Donkey-anti-Goat-IgG-H-L-Cross-Adsorbed-Secondary-Antibody-Polyclonal/A-11057">https://www.thermofisher.com/antibody/product/Donkey-anti-Goat-IgG-H-L-Cross-Adsorbed-Secondary-Antibody-Polyclonal/A-11057</a><br/> <a href="https://www.thermofisher.com/antibody/product/Goat-anti-Mouse-IgG-H-L-Highly-Cross-Adsorbed-Secondary-Antibody-Polyclonal/A-21236">https://www.thermofisher.com/antibody/product/Goat-anti-Mouse-IgG-H-L-Highly-Cross-Adsorbed-Secondary-Antibody-Polyclonal/A-21236</a><br/> <a href="https://www.thermofisher.com/antibody/product/Donkey-anti-Goat-IgG-H-L-Cross-Adsorbed-Secondary-Antibody-Polyclonal/A-11055">https://www.thermofisher.com/antibody/product/Donkey-anti-Goat-IgG-H-L-Cross-Adsorbed-Secondary-Antibody-Polyclonal/A-11055</a><br/> <a href="https://www.thermofisher.com/antibody/product/Donkey-anti-Rabbit-IgG-H-L-Highly-Cross-Adsorbed-Secondary-Antibody-Polyclonal/A-31573">https://www.thermofisher.com/antibody/product/Donkey-anti-Rabbit-IgG-H-L-Highly-Cross-Adsorbed-Secondary-Antibody-Polyclonal/A-31573</a></p> <p>Western Blot primary antibodies<br/> p62: <a href="https://www.sigmaaldrich.com/content/dam/sigma-aldrich/docs/Sigma/Datasheet/2/p0067dat.pdf">https://www.sigmaaldrich.com/content/dam/sigma-aldrich/docs/Sigma/Datasheet/2/p0067dat.pdf</a><br/> gamma-tubulin: <a href="https://www.sigmaaldrich.com/content/dam/sigma-aldrich/docs/Sigma/Datasheet/1/t5326dat.pdf">https://www.sigmaaldrich.com/content/dam/sigma-aldrich/docs/Sigma/Datasheet/1/t5326dat.pdf</a><br/> LC3: <a href="https://www.mblintl.com/products/pm036/">https://www.mblintl.com/products/pm036/</a><br/> Atg5: <a href="https://www.cellsignal.com/products/primary-antibodies/atg5-antibody/2630">https://www.cellsignal.com/products/primary-antibodies/atg5-antibody/2630</a><br/> <math>\beta</math> actin: <a href="https://www.abcam.com/beta-actin-antibody-mabcam-8224-loading-control-ab8224.html">https://www.abcam.com/beta-actin-antibody-mabcam-8224-loading-control-ab8224.html</a></p> |

## Eukaryotic cell lines

Policy information about [cell lines](#)

|                                                                   |                                                               |
|-------------------------------------------------------------------|---------------------------------------------------------------|
| Cell line source(s)                                               | Huh7 and HeLa cells were purchased from ATCC.                 |
| Authentication                                                    | None of the cell lines used were authenticated.               |
| Mycoplasma contamination                                          | All cell line tested negative for mycoplasma contamination.   |
| Commonly misidentified lines (See <a href="#">ICLAC</a> register) | No commonly misidentified cell lines were used in this study. |

## Animals and other organisms

Policy information about [studies involving animals](#); [ARRIVE guidelines](#) recommended for reporting animal research

|                         |                                                                                                                                                                                                         |
|-------------------------|---------------------------------------------------------------------------------------------------------------------------------------------------------------------------------------------------------|
| Laboratory animals      | C57BL/6J males, of age between 6 and 8 weeks .                                                                                                                                                          |
| Wild animals            | The study did not involve wild animals.                                                                                                                                                                 |
| Field-collected samples | The study did not involve samples collected from the field.                                                                                                                                             |
| Ethics oversight        | All the protocols were approved by the internal animal care committee of Instituto de Medicina Molecular João Lobo Antunes, Portugal and were performed according to national and European regulations. |

Note that full information on the approval of the study protocol must also be provided in the manuscript.

## Flow Cytometry

### Plots

Confirm that:

- The axis labels state the marker and fluorochrome used (e.g. CD4-FITC).
- The axis scales are clearly visible. Include numbers along axes only for bottom left plot of group (a 'group' is an analysis of identical markers).
- All plots are contour plots with outliers or pseudocolor plots.
- A numerical value for number of cells or percentage (with statistics) is provided.

### Methodology

|                           |                                                                                                                                                                                                                                                                                                                                                                                    |
|---------------------------|------------------------------------------------------------------------------------------------------------------------------------------------------------------------------------------------------------------------------------------------------------------------------------------------------------------------------------------------------------------------------------|
| Sample preparation        | For infected Huh7/ HeLa, cells were trypsinized and resuspended in 300 µl of media. 50 µl of each sample were analysed. For infected RBC (iRBC), 5 µl blood from each mouse was diluted in 200 µl PBS, and was analysed by flow cytometry.                                                                                                                                         |
| Instrument                | BD Accuri C6 (Huh7/HeLa) and BD LSFortessa (iRBC).                                                                                                                                                                                                                                                                                                                                 |
| Software                  | FlowJo                                                                                                                                                                                                                                                                                                                                                                             |
| Cell population abundance | Not relevant to this study.                                                                                                                                                                                                                                                                                                                                                        |
| Gating strategy           | For infected Huh7/HeLa, cells were first gated in FSC (A) vs SSC (A). Within this cell population, GFP positive infected cells were gated in FITC (GFP) vs FL2. For iRBC, starting cell population was gated in FSC (A) vs SSC (A). Next, single cell population were gated in FSC (A) vs FSC (W). Within this cell population, GFP positive iRBC were gated in FITC (GFP) vs FL2. |

- Tick this box to confirm that a figure exemplifying the gating strategy is provided in the Supplementary Information.
